# Supplementary material for: Global prevalence and mortality of severe Plasmodium malariae infection: a systematic review and meta-analysis
Source: Malar J. 2020 Jul 31;19:274. doi: 10.1186/s12936-020-03344-z (PMC7395392; doi:10.1186/s12936-020-03344-z)
Supplement: Supplementary file 2 — Additional file 2. Data for calculate the pooled prevalence estimate of severe P. malariae infection. [file 12936_2020_3344_MOESM2_ESM.xlsx]

## Sheet: Sheet1
Authors	severe cases	All patients
Bottieau et al., 2006	3	16
Chaparro et al., 2013	6	47
Douglas et al., 2013	95	4045
Hwang et al., 2014	22	1254
Langford et al., 2015	232	5097
Wangdahl et al., 2019	2	61
	360	10520
