# Supplementary material for: Global prevalence and mortality of severe Plasmodium malariae infection: a systematic review and meta-analysis
Source: Malar J. 2020 Jul 31;19:274. doi: 10.1186/s12936-020-03344-z (PMC7395392; doi:10.1186/s12936-020-03344-z)
Supplement: Supplementary file 3 — Additional file 3. Data for calculate the pooled prevalence estimate of complications for P. malariae malaria. [file 12936_2020_3344_MOESM3_ESM.xlsx]

## Sheet: Sheet1
Complications	case	all
Pulmonary complication	48	2726
Cerebral malaria	3	692
ARF	25	1373
Hypotension/shock	1	47
Jaundice	4	345
Severe anaemia	349	12678
